# Supplementary material for: Ni3S2 anchored to N/S co-doped reduced graphene oxide with highly pleated structure as a sulfur host for lithium–sulfur batteries
Source: Royal Society of Chemistry journal article supplement (doi:10.1039/c9ta12235d), 2020-01-01
Supplement: c9ta12235d1.pdf [file c9ta12235d1.pdf]

## Supporting Information

### **Ni<sub>3</sub>S<sub>2</sub> Anchored into N/S co-doped Reduced Graphene Oxide with Highly Pleated Structure as a Sulfur Host for Lithium-Sulfur Batteries**

**Daying Guo,<sup>a</sup> Ziheng Zhang,<sup>c</sup> Bin Xi,<sup>a,\*</sup> Zhisheng Yu,<sup>b</sup> Zhen Zhou<sup>c,\*</sup> and Xi'an Chen<sup>b,\*</sup>**

<sup>a</sup> School of Materials Science and Engineering, Sun Yat-sen University, Guangzhou, China 510275; <sup>b</sup> Key Laboratory of Carbon Materials of Zhejiang Province, College of Chemistry and Materials Engineering, Wenzhou University, Wenzhou, China 325035; <sup>c</sup> Tianjin Key Laboratory of Metal and Molecule Based Material Chemistry Key Laboratory of Advanced Energy Materials Chemistry (Ministry of Education); Institute of New Energy Material Chemistry Collaborative Innovation Center of Chemical Science and Engineering (Tianjin); School of Materials Science and Engineering National Institute for Advanced Materials Nankai University Tianjin, China 300350

\* To whom correspondence should be addressed. E-mail: [xibin3@mail.sysu.edu.cn](mailto:xibin3@mail.sysu.edu.cn); [zhouzhen@nankai.edu.cn](mailto:zhouzhen@nankai.edu.cn); [xianchen@wzu.edu.cn](mailto:xianchen@wzu.edu.cn)

### **Materials Characterization**

The weight percentages of Ni<sub>3</sub>S<sub>2</sub> in the composites were measured using a TG/DTA thermo-gravimetric analyzer (Diamond PE) under an O<sub>2</sub> atmosphere at a heating rate of 10 °C min<sup>-1</sup> from room temperature to 950 °C, with a flow rate of 80 mL min<sup>-1</sup>. The oxidation of Ni<sub>3</sub>S<sub>2</sub> in O<sub>2</sub> goes through multiple steps:

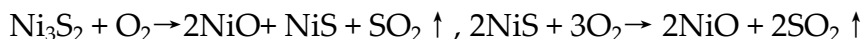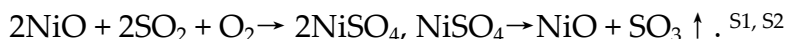

## Electrochemical measurements

Galvanostatic charge/discharge tests were conducted on fabricated CR2025-type coin battery, to evaluate the electrochemical capacity and cycle stability of the electrodes on the basis of the active sulfur at current densities of 0.2 C, 0.5 C, 1 C, 2 C, 3 C, 5 C (1 C = 1675 mA h g<sup>-1</sup>) from 1.5 to 3.0 V using a LANHE instrument. Cyclic Voltammetry data were recorded on a CHI660e electrochemical workstation between 1.8 and 2.6 V to characterize the redox behavior and the kinetic reversibility of the cell. The AC impedance was measured with fresh cells at the open circuit potential. This was also carried out using a CHI 760e electrochemical workstation. The ac amplitude was 5 mV and the frequency ranged from 100 kHz to 0.01 Hz. In addition, the amount of electrolyte is maintained to ~15  $\mu$ L/ mg (sulfur) for the batteries cathode with the low sulfur areal density, ~12  $\mu$ L/ mg (sulfur) for the batteries cathode with the high sulfur areal density.

**Elevate loading of sulfur.** High sulfur loading on the cathode is helpful to obtain high energy density batteries. Therefore, the effects of different sulfur loading on the performance of batteries are studied (**Figure S22**). When the percentages of sulfur loaded are 61% and 81% (**Figure S22a**), the reversible discharge capacity are 1664.5 mAh g<sup>-1</sup> and 1346.8 mAh g<sup>-1</sup> at 0.2 C (**Figure S22b**), respectively, corresponding to active material utilization rate of 99.4% and 80.4%. It can be seen that as the sulfur loading increases, the specific discharge capacity decreases gradually. The capacity obtained at various rates are shown in **Table S9**. Interestingly, even 81% sulfur was loaded, corresponding discharge capacity still reaches 1346.8 mAh g<sup>-1</sup> at 0.2 C and 762.9 mAh g<sup>-1</sup> at 25-fold current density, i.e. 5 C (**Figure S22b**). As shown in **Figure S22c**, the discharge capacity of 3/S 81% is 972.6 mAh g<sup>-1</sup> in the 1<sup>st</sup> cycle at 1 C and the decay rate is 0.11% per cycle after 500 cycles. Regarding to 3/S 61%, the results that initial capacity of 1258.6 mA h g<sup>-1</sup> dropped to 778.3 mA h g<sup>-1</sup> over 500 charge-discharge cycle at 1 C and the decay rate of

0.076% per cycle, represent the fastest capacity retention and most stable performance.

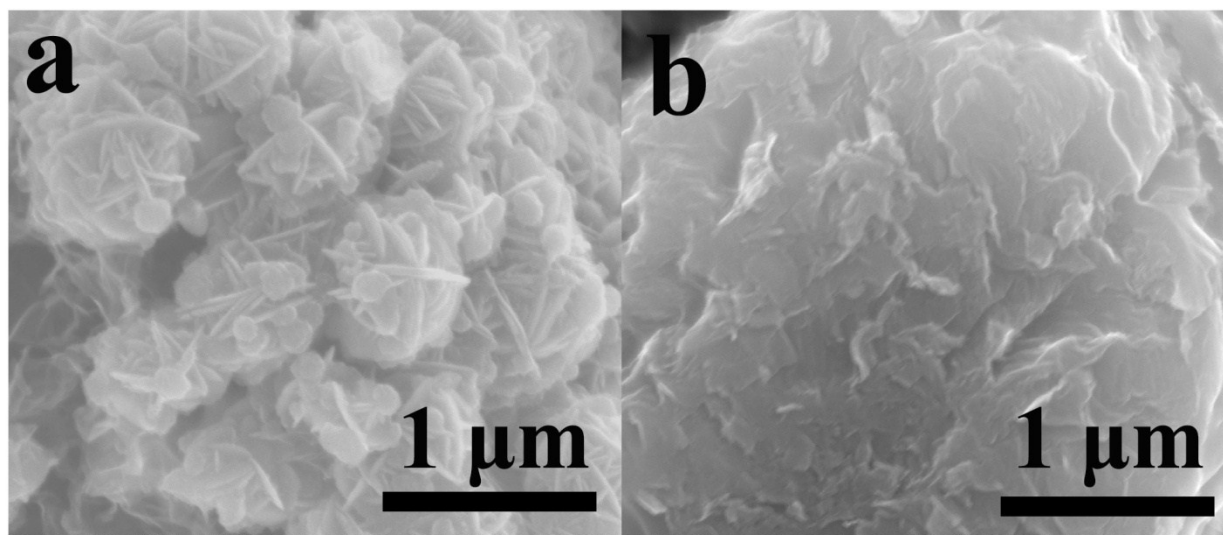

**Figure S1.** SEM images of  $\text{Ni}_3\text{S}_2$ -800°C (a), composite 1 (b)

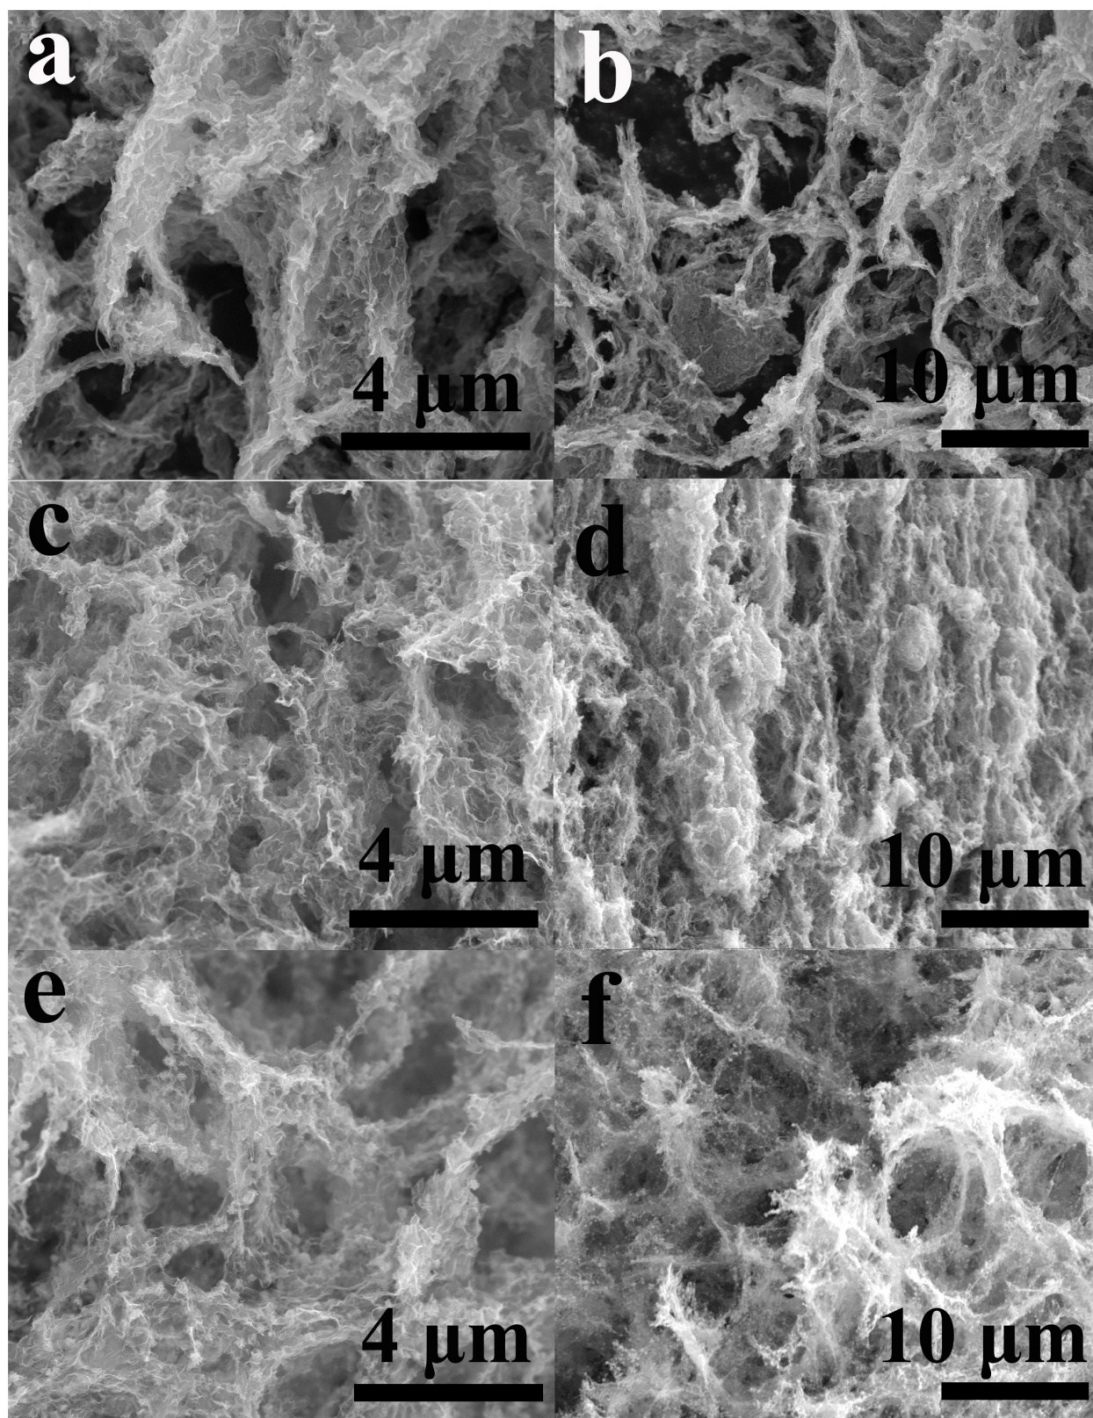

**Figure S2.** SEM images of composites **2** (a, b), **3** (c, d) and **4** (e, f)

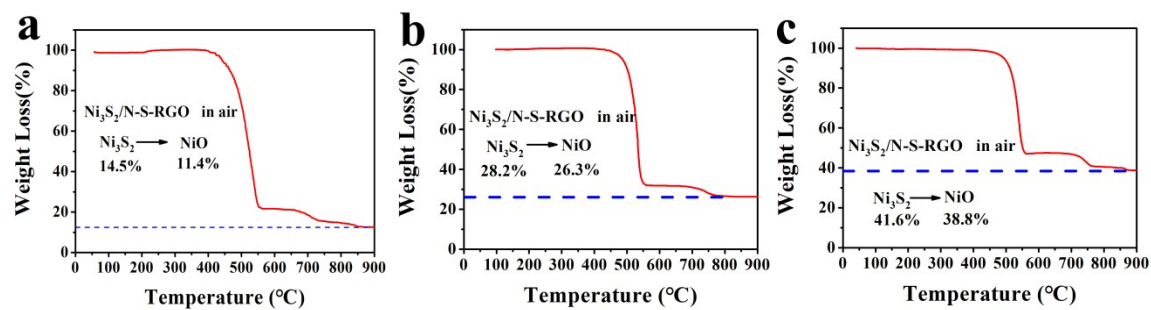

**Figure S3.** TGA images of 2 (a), 3 (b) and 4 (c)

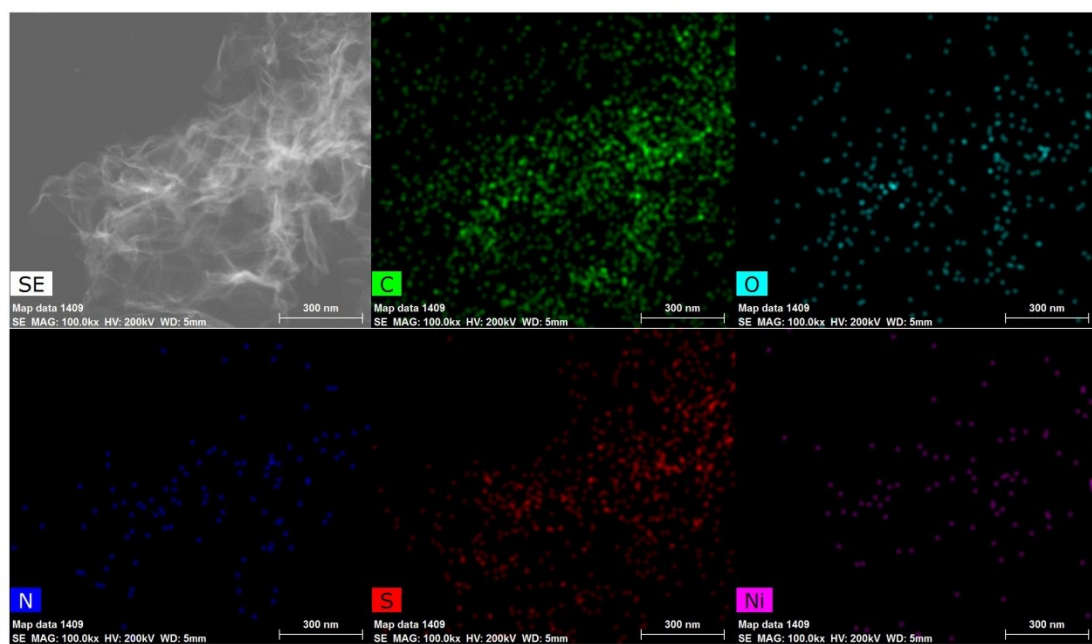

**Figure S4.** TEM image and EDS elemental mapping of composite 3.

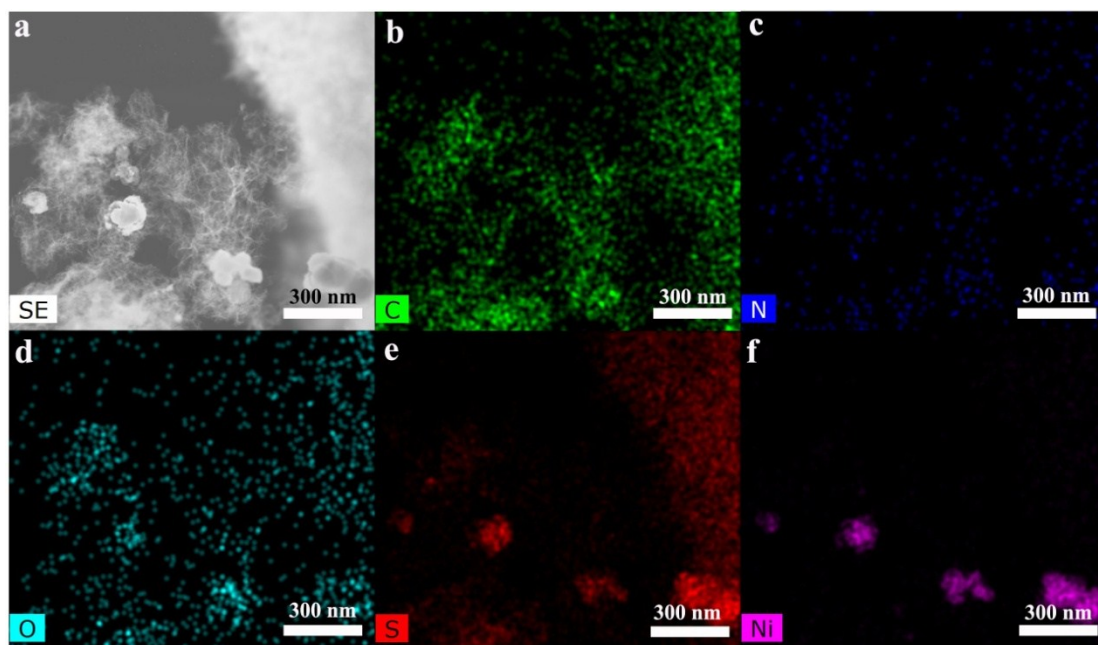

**Figure S5.** TEM image and EDS elemental mapping of composite 4.

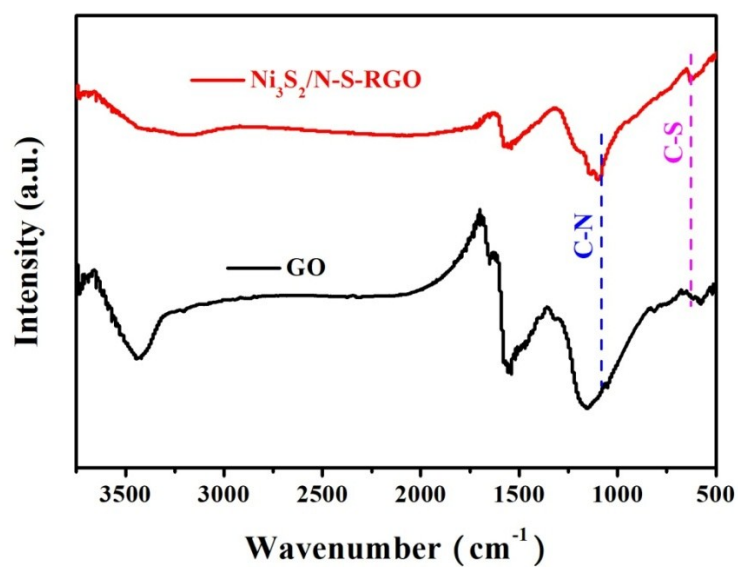

**Figure S6.** FTIR spectra of GO and  $\text{Ni}_3\text{S}_2/(\text{N}, \text{S})\text{-RGO}$ .

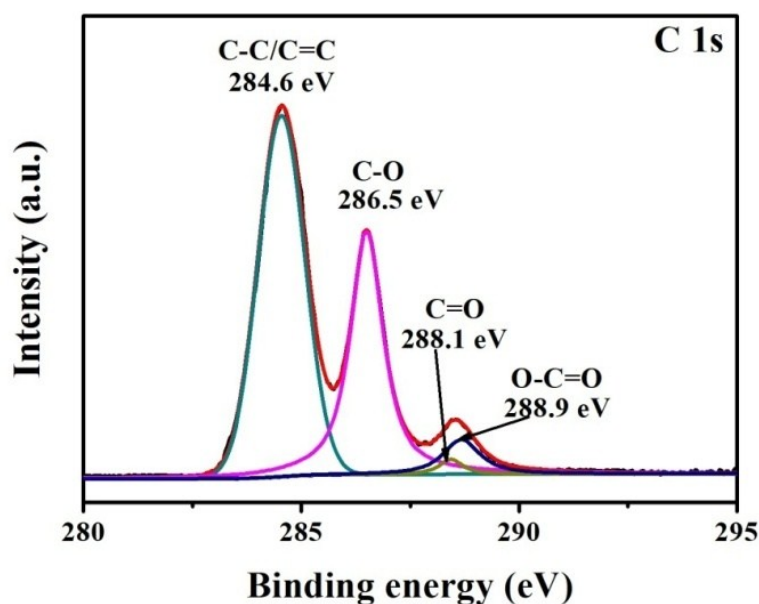

**Figure S7.** High resolution XPS of C 1s in GO.

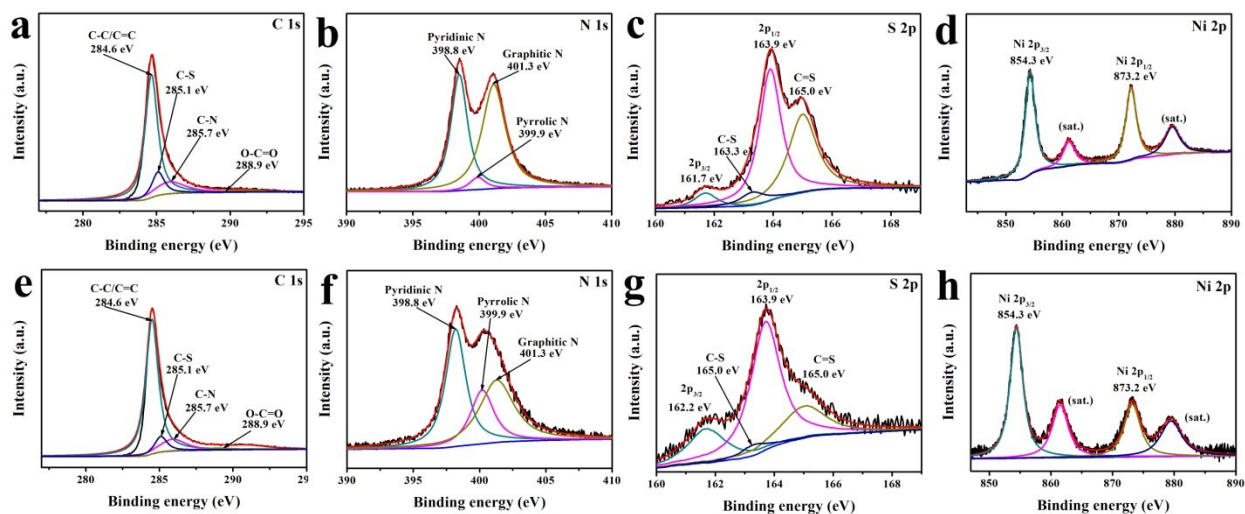

**Figure S8.** High resolution XPS of (a) C 1s, (b) N 1s, (c) S 2p and (d) Ni 2p in composite **2**. (e) C 1s, (f) N 1s, (g) S 2p and (h) Ni 2p of composite **4**.

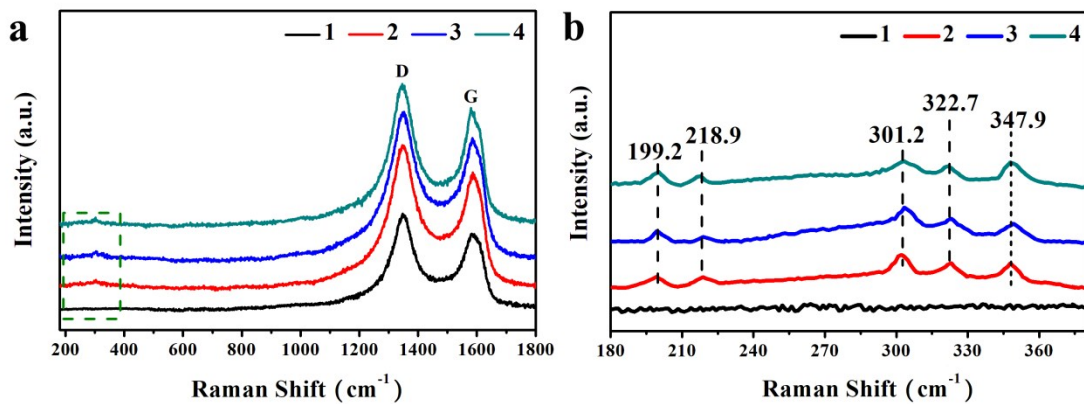

**Figure S9.** (a) Raman spectra of composites 1, 2, 3 and 4; (b) the enlarged part of the green marked area in (a);

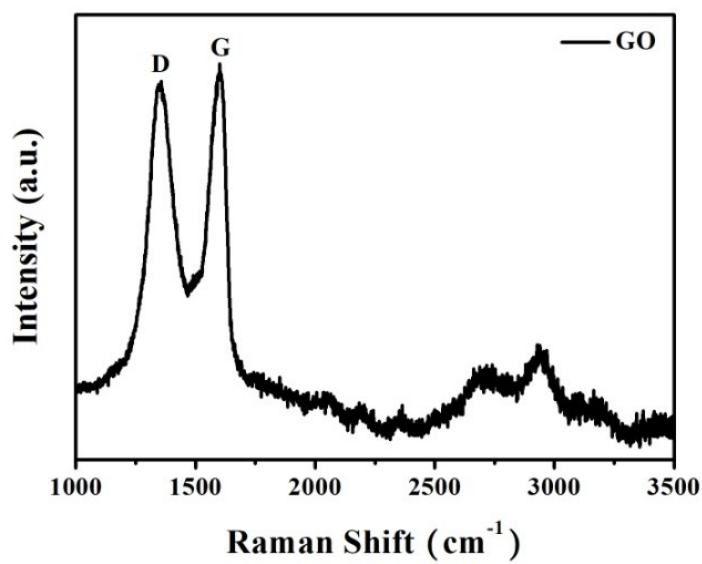

**Figure S10.** Raman spectra of GO

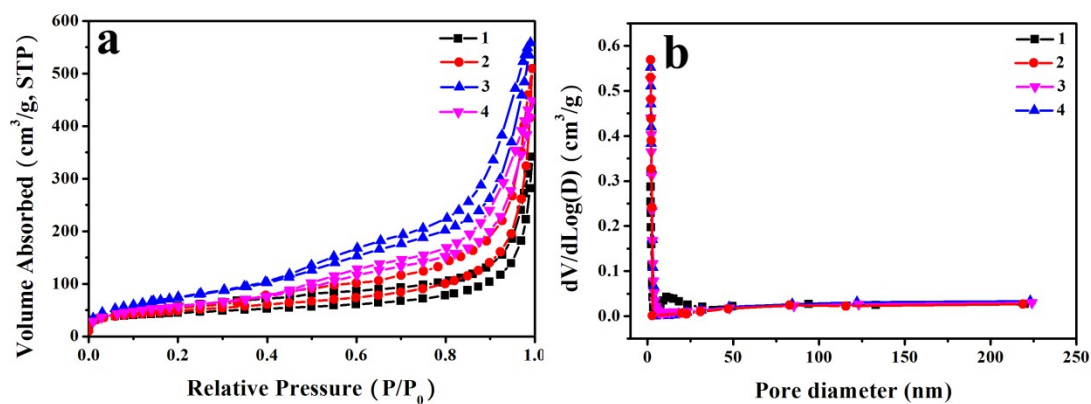

**Figure S11.** (a)  $N_2$  adsorption/desorption isotherm (b) the curves for the corresponding pore size distribution of composites 1, 2, 3 and 4.

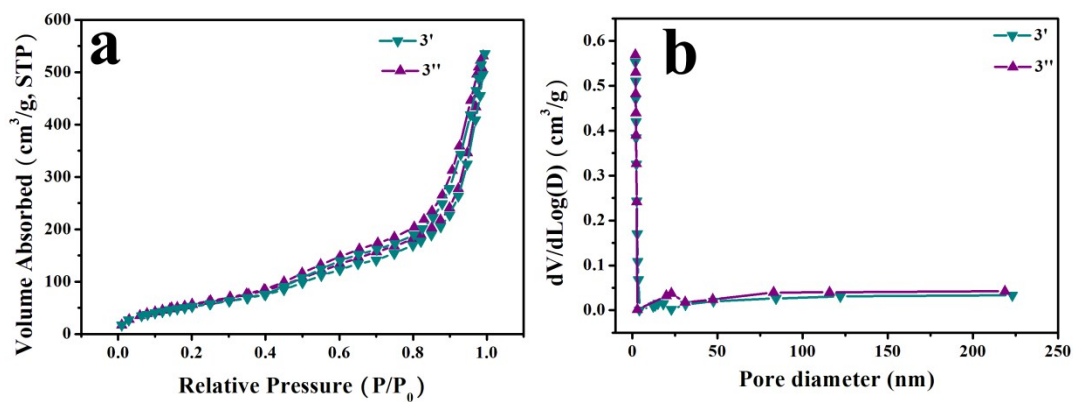

**Figure S12.** (a)  $N_2$  adsorption/desorption isotherm (b) the curves for the corresponding pore size distribution of composites 3', and 3''.

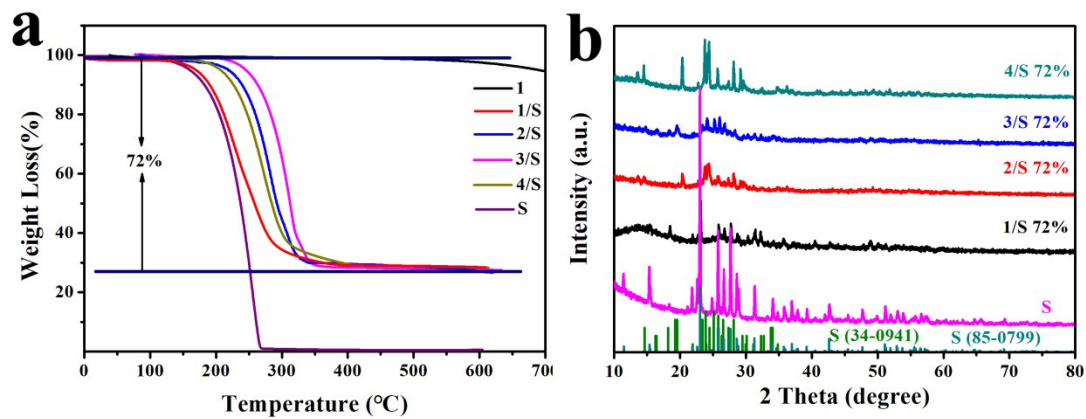

**Figure S13.** (a) TGA curves and (b) XRD patterns of S, composites 1, 2, 3 and 4.

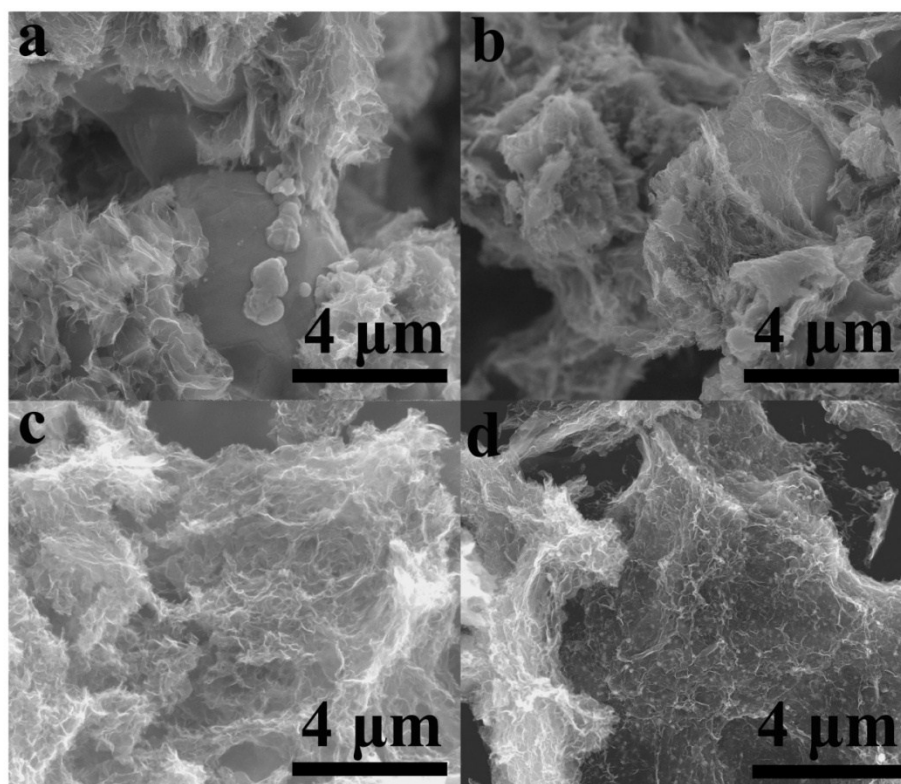

**Figure S14.** SEM images of (a) 1/S 72%, (b) 2/S 72%, (c) 3/S 72% and (d) 4/S 72%.

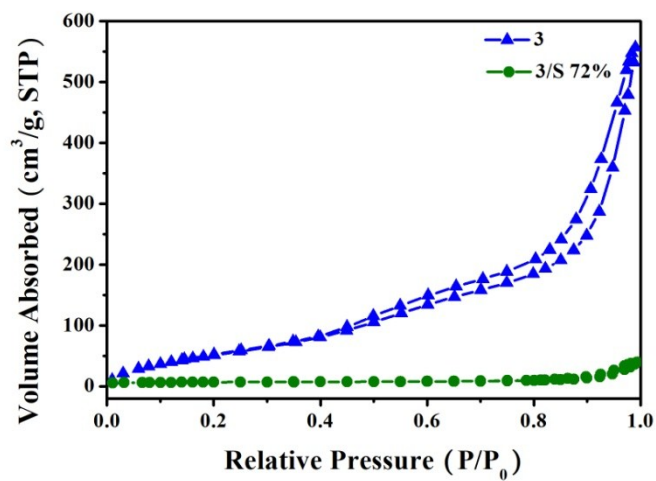

**Figure S15.** N<sub>2</sub> adsorption/desorption isotherm of composites **3** and **3/S 72%**.

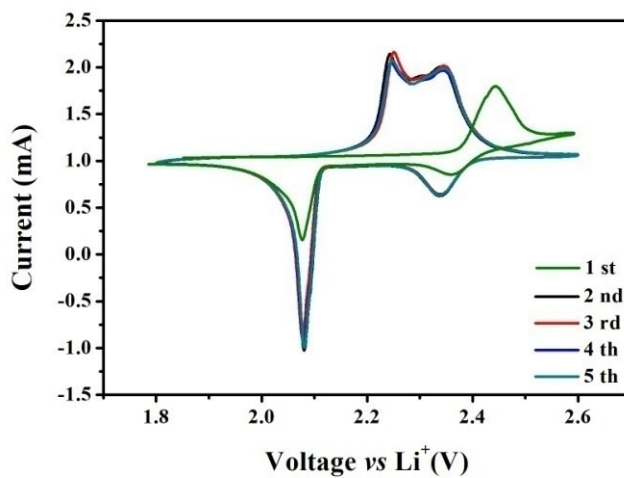

**Figure S16.** Typical CV curve of the **3/S 72%/Li** cell at a scan rate of 0.1 mV s<sup>-1</sup>.

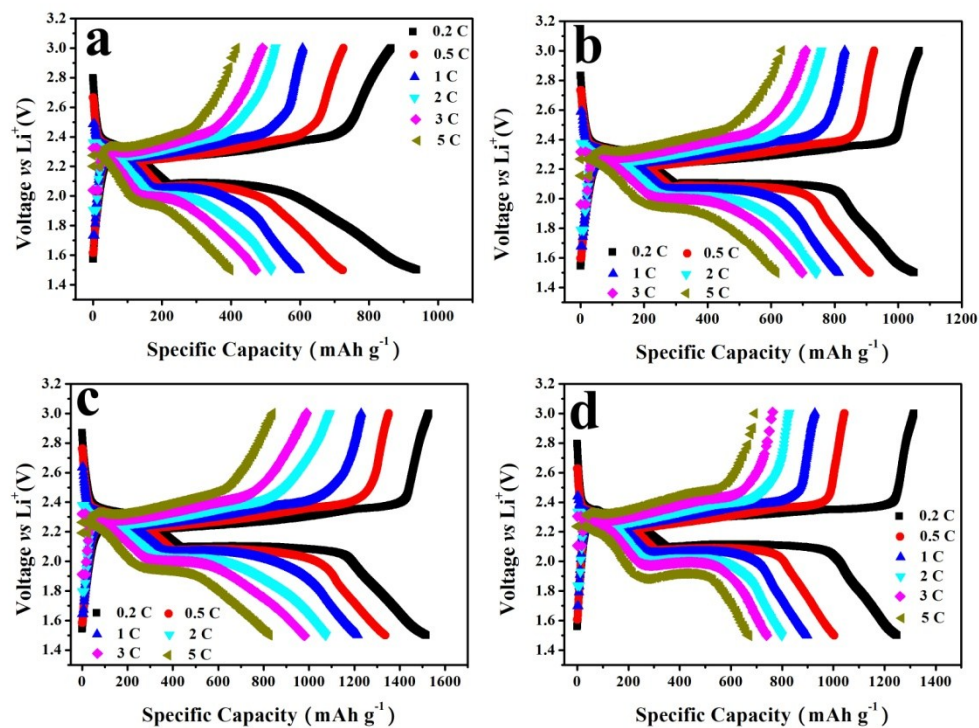

**Figure S17.** Discharge-charge curves recorded at different rates for composites (a) 1/S 72%, (b) 2/S 72%, (c) 3/S 72% and (d) 4/S 72%/Li cells.

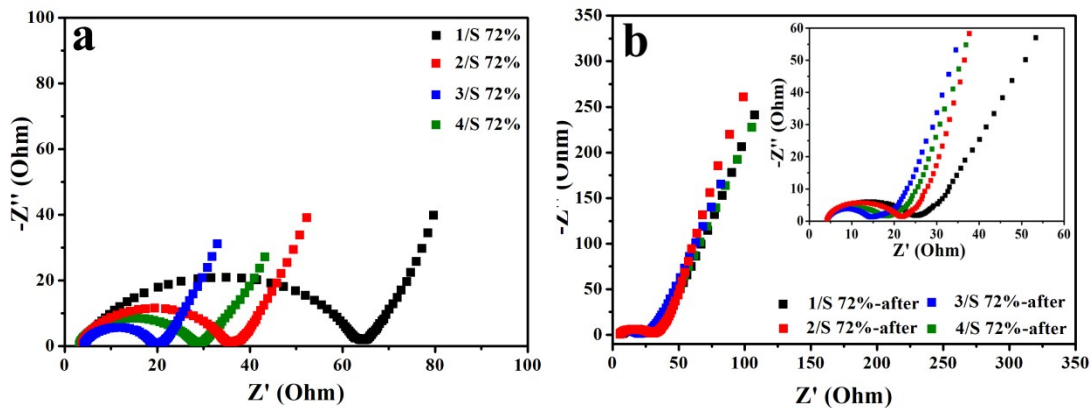

**Figure S18.** The Nyquist plots of (a) before and (b) after 500 cycles of battery testing on composites 1/S 72%, 2/S 72%, 3/S 72% and 4/S 72%/Li cells.

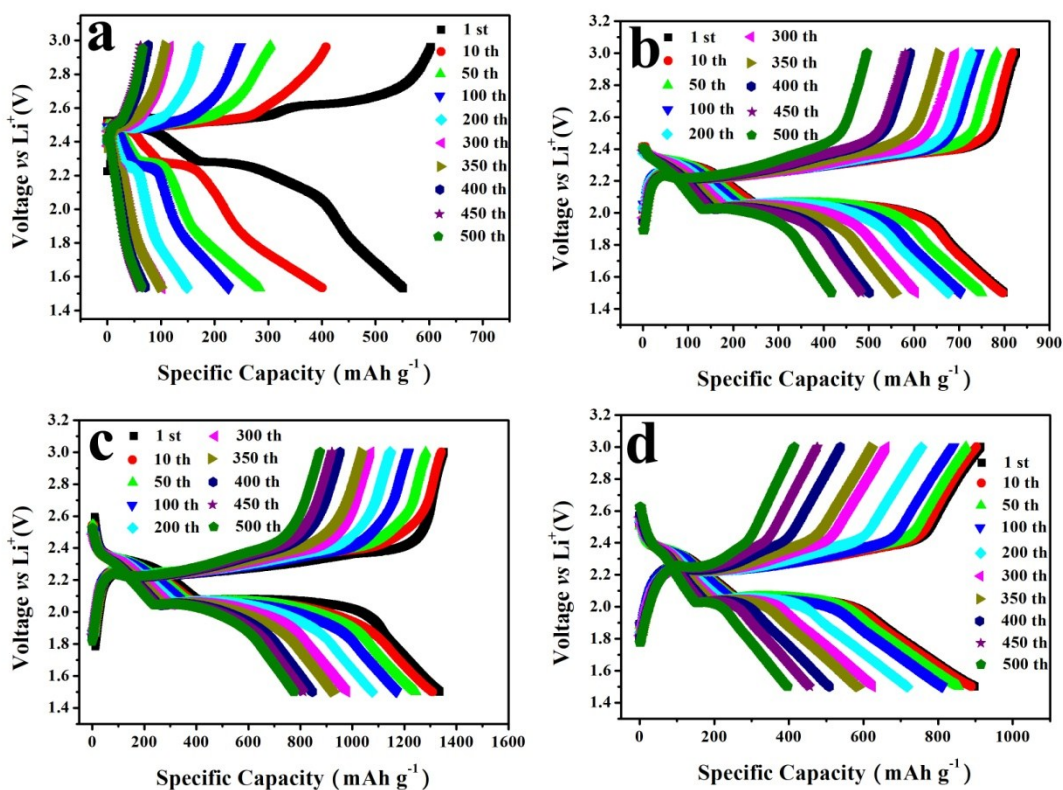

**Figure S19.** Galvanostatic discharge-charge curves recorded at different cycles for composites (a) 1/S 72%, (b) 2/S 72%, (c) 3/S 72% and (d) 4/S 72%/Li cells.

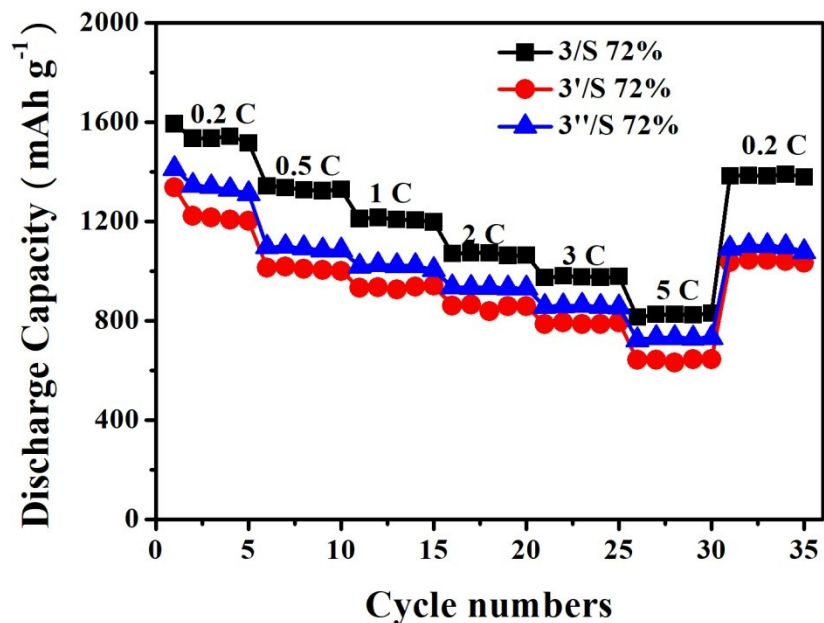

**Figure S20.** Reversible capacity *vs.* current density (rate capability) of the cells with the as-prepared 3/S 72%, 3'/S 72% and 3''/S 72% cathodes.

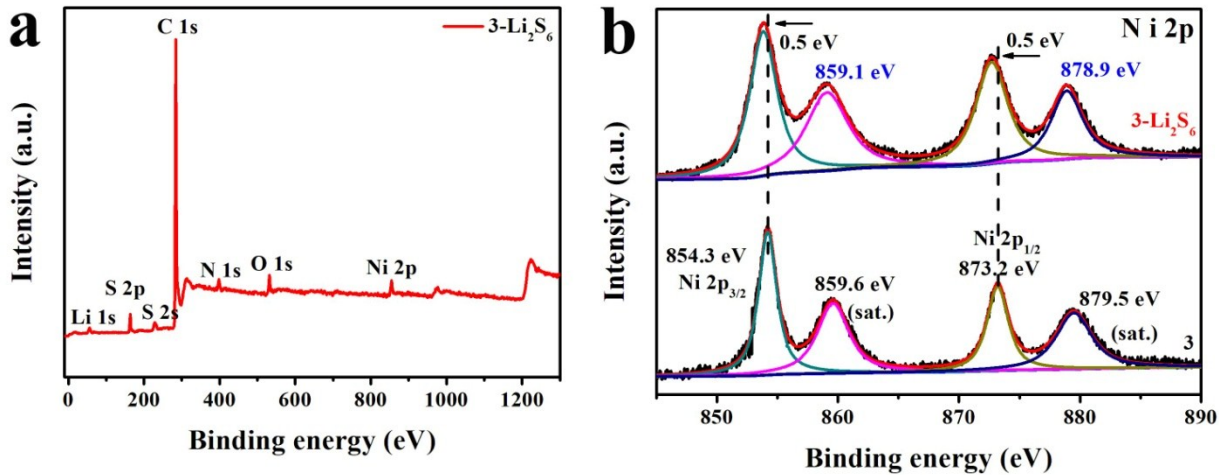

**Figure S21.** XPS survey spectrum of sample Li<sub>2</sub>S<sub>6</sub>-treated composite **3** (3-Li<sub>2</sub>S<sub>6</sub>); (e) XPS spectra of Ni 2p regions for the **3** and 3-Li<sub>2</sub>S<sub>6</sub>.

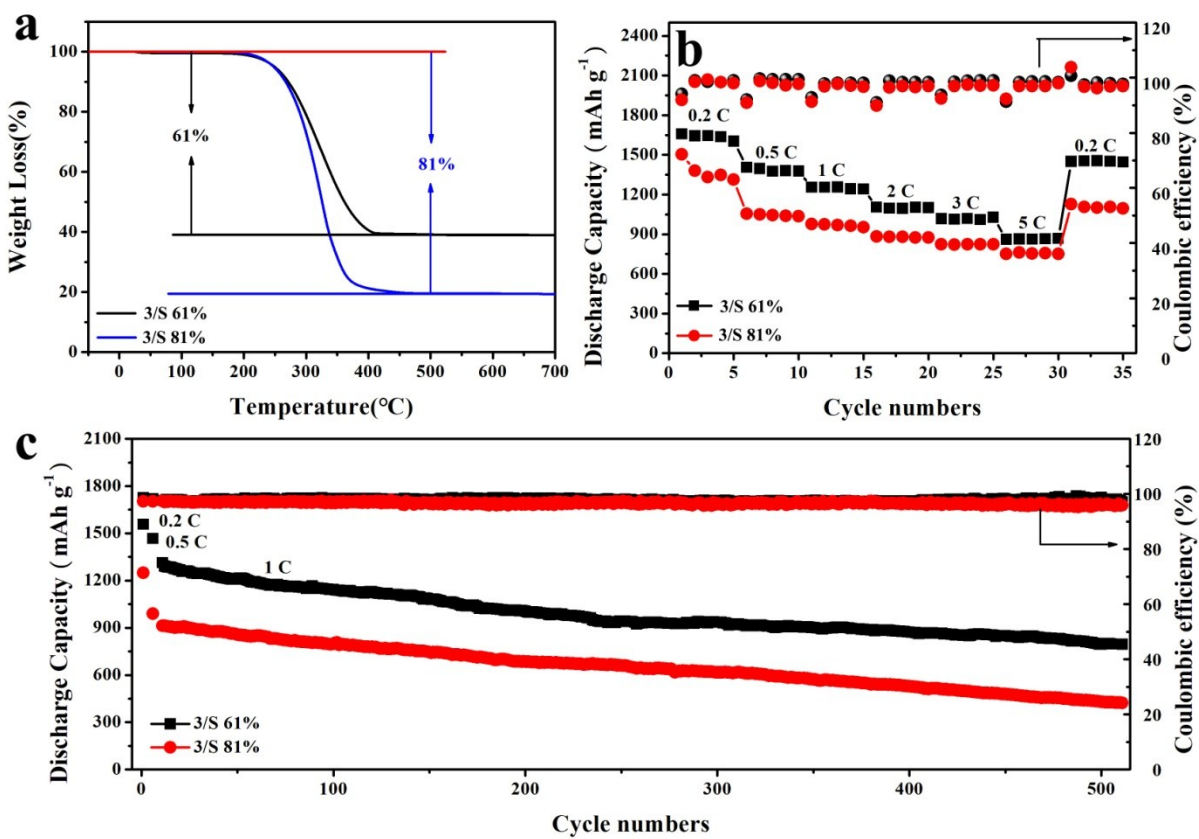

**Figure S22.** (a) TGA curves; (b) rate capability; (c) cycle performance at constant current rate of 1 C and corresponding Coulombic efficiency of the cells with 3/S 61% and 3/S 81% cathodes.

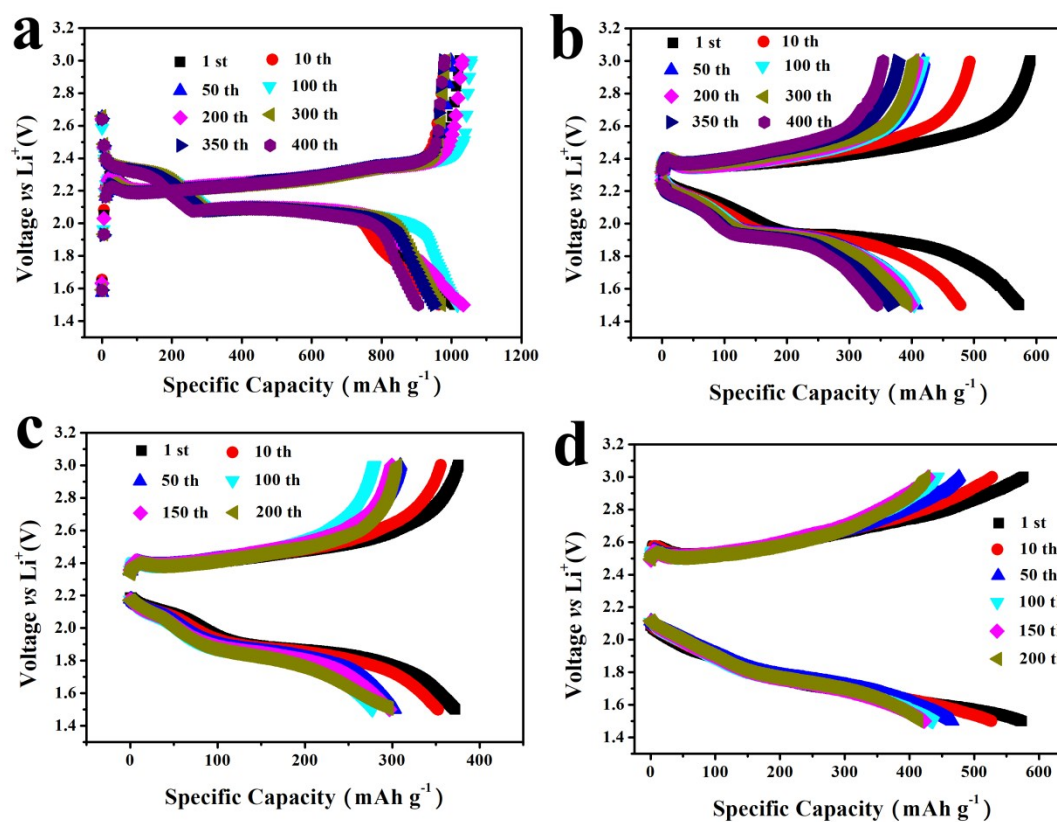

**Figure S23.** Galvanostatic discharge-charge curves recorded at different cycles for 3/S 72%; (a) areal sulfur loading contents of  $2.7 \text{ mg-sulfur cm}^{-2}$  at  $1 \text{ C}$ ; (b) areal sulfur loading contents of  $4.2 \text{ mg-sulfur cm}^{-2}$  at  $3 \text{ C}$ ; (c) areal sulfur loading contents of  $4.2 \text{ mg-sulfur cm}^{-2}$  at  $5 \text{ C}$ ; (d) areal sulfur loading contents of  $5.8 \text{ mg-sulfur cm}^{-2}$  at  $1 \text{ C}$ .

**Table S1.** The atomic percentages of C, N, O, S and Ni evaluated by XPS.

| Composite | C      | N     | O     | S     | Ni    |
|-----------|--------|-------|-------|-------|-------|
| 1         | 91.76% | 3.33% | 4.63% | 0.27% | /     |
| 2         | 91.95% | 3.99% | 3.61% | 0.28% | 0.17% |
| 3         | 89.45% | 4.99% | 2.80% | 2.54% | 0.22% |
| 4         | 91.06% | 3.63% | 3.73% | 1.06% | 0.52% |

**Table S2.** The atomic percentages of different nitrogen species in composites 2, 3 and 4.

| Composite | pyridinic-N | pyrrolic-N | graphitic -N |
|-----------|-------------|------------|--------------|
| 1         | 1.10%       | 0.64%      | 1.59%        |
| 2         | 1.63%       | 0.87%      | 1.49%        |
| 3         | 2.12%       | 0.21%      | 2.66%        |
| 4         | 1.54%       | 0.54%      | 1.55%        |

**Table S3.** Raman spectra of composites 1-4 and GO.

| Composite | I <sub>D</sub> /I <sub>G</sub> |
|-----------|--------------------------------|
| 1         | 1.24                           |
| 2         | 1.17                           |
| 3         | 1.15                           |
| 4         | 1.11                           |
| GO        | 0.95                           |

**Table S4.** Specific surface area and pore volume of composites **1**, **2**, **3** and **4** evaluated by the Brunauer-Emmett-Teller (BET) and the Barrett–Joyner–Halenda (BJH) method.

| Composite | SSA (m <sup>2</sup> /g) | Pore Volume (cm <sup>3</sup> /g) |
|-----------|-------------------------|----------------------------------|
| <b>1</b>  | 184                     | 0.32                             |
| <b>2</b>  | 477                     | 1.54                             |
| <b>3</b>  | 618                     | 1.73                             |
| <b>4</b>  | 510                     | 1.61                             |

**Table S5.** Specific surface area and pore volume of composites **3'** and **3''** evaluated by the Brunauer-Emmett-Teller (BET) and the Barrett–Joyner–Halenda (BJH) method.

| Composite  | SSA (m <sup>2</sup> /g) | Pore Volume (cm <sup>3</sup> /g) |
|------------|-------------------------|----------------------------------|
| <b>3'</b>  | 599                     | 1.59                             |
| <b>3''</b> | 610                     | 1.66                             |

**Table S6.** Specific surface area and pore volume of composites **3** and **3/S 72%** evaluated by the Brunauer-Emmett-Teller (BET) and the Barrett–Joyner–Halenda (BJH) method.

| Composite      | SSA (m <sup>2</sup> /g) | Pore Volume (cm <sup>3</sup> /g) |
|----------------|-------------------------|----------------------------------|
| <b>3</b>       | 618                     | 1.73                             |
| <b>3/S 72%</b> | 12                      | 0.11                             |

**Table S7.** The rate performance (mAh g<sup>-1</sup>) of 1/S 72%, 2/S 72%, 3/S 72% and 4/S 72%/Li cells.

| Composite | 0.2 C  | 0.5 C  | 1 C    | 2 C    | 3 C   | 5 C   | 0.2 C  |
|-----------|--------|--------|--------|--------|-------|-------|--------|
| 1/S 72%   | 945.1  | 723.7  | 599.3  | 516.7  | 471.6 | 397.8 | 673.2  |
| 2/S 72%   | 1078.1 | 911.3  | 813.6  | 742.7  | 697.7 | 616.8 | 900.6  |
| 3/S 72%   | 1534.8 | 1336.4 | 1215.5 | 1074.5 | 981.1 | 826.2 | 1385.7 |
| 4/S 72%   | 1248.4 | 1004   | 897.8  | 799    | 739.7 | 672.2 | 1053.8 |

**Table S8.** A comparison of cycling performance between this work and some other Li-S cells with long cycle stability reported in literatures.

| Cathode materials       | Sloading<br>area density<br>(mg cm <sup>-2</sup> ) | Cycling performance |        |                     | Capacity<br>decay rate per<br>cycle (%) | Refs.               |
|-------------------------|----------------------------------------------------|---------------------|--------|---------------------|-----------------------------------------|---------------------|
|                         |                                                    | C                   | cycles | mAh g <sup>-1</sup> |                                         |                     |
| TiN-S                   | 1.0                                                | 0.5                 | 500    | 988 - 644           | 0.19                                    | S3                  |
| TiS <sub>2</sub> -60S   | 1.0                                                | 1                   | 1000   | 1021 - 613          | 0.04                                    | S4                  |
| 3Mo <sub>2</sub> C/7S   | 1.0                                                | 0.2                 | 300    | 1200 - 800          | 0.11                                    | S5                  |
| C@SnO <sub>2</sub> /S   | 1.0                                                | 2                   | 1000   | 745 - 564           | 0.24                                    | S6                  |
| C@TiO <sub>2</sub> @C-S | 1.0                                                | 2                   | 500    | 774 - 511           | 0.068                                   | S7                  |
| 3/S 72%                 | 1.5                                                | 3                   | 1000   | 959- 732            | 0.023                                   | <b>This<br/>wok</b> |

**Table S9.** The rate performance (mAh g<sup>-1</sup>) of 3/S 72%, 3'/S 72% and 3''/S 72%/Li cells.

| Composite | 0.2 C  | 0.5 C  | 1 C    | 2 C    | 3 C   | 5 C   | 0.2 C  |
|-----------|--------|--------|--------|--------|-------|-------|--------|
| 3/S 72%   | 1534.8 | 1336.4 | 1215.5 | 1074.5 | 981.1 | 826.2 | 1385.7 |
| 3'/S 72%  | 1222.6 | 1017.3 | 934.5  | 864.8  | 794.9 | 642.7 | 1044.8 |
| 3''/S 72% | 1345.4 | 1099.5 | 1027.2 | 934.3  | 860.6 | 732.5 | 1102.7 |

**Table S10.** The rate performance (mAh g<sup>-1</sup>) of 3/S 61% and 3/S 81%/Li cells.

| Composite | 0.2 C  | 0.5 C  | 1 C    | 2 C    | 3 C    | 5 C   | 0.2 C  |
|-----------|--------|--------|--------|--------|--------|-------|--------|
| 3/S 61%   | 1664.5 | 1381.9 | 1254.6 | 1108.2 | 1013.7 | 863.9 | 1453.4 |
| 3/S 81%   | 1346.8 | 1050.7 | 978.1  | 880.6  | 822.2  | 762.9 | 1106.6 |

**Table S11.** The rate capability (mAh g<sup>-1</sup>) of the cells with as-prepared 3/S cathodes different areal sulfur loading contents of **A** 2.7, **B** 4.2 and **C** 5.8 mg-sulfur cm<sup>-2</sup>

| Composite | 0.05 C | 0.2 C  | 0.5 C  | 1 C   | 2 C   | 3 C   | 5 C   | 0.05 C |
|-----------|--------|--------|--------|-------|-------|-------|-------|--------|
| <b>A</b>  | 1333.9 | 1123.6 | 1000.9 | 925.6 | 840.3 | 756.3 | 648.4 | 1027.8 |
| <b>B</b>  | 1233.1 | 1054.6 | 929.1  | 790.6 | 701.3 | 493.2 | 380.6 | 916.1  |
| <b>C</b>  | 1158.2 | 1009.7 | 784.3  | 574.8 | 439.8 | 307.8 | 149.9 | 807.2  |

**Table S12.** A comparison of cycling performance between this work and some other Li-S cells with loading high sulfur area density reported in literatures.

| Cathode materials    | Sloading<br>area density<br>(mg cm <sup>-2</sup> ) | Cycling performance |        |                     | Capacity<br>decay rate per<br>cycle (%) | Refs.               |
|----------------------|----------------------------------------------------|---------------------|--------|---------------------|-----------------------------------------|---------------------|
|                      |                                                    | C                   | cycles | mAh g <sup>-1</sup> |                                         |                     |
| G-VS <sub>2</sub> /S | 5.0                                                | 0.2                 | 50     | 1015 - 800          | 0.42                                    | S8                  |
| MC-NS/S              | 4.5                                                | 1                   | 200    | 586 - 382           | 0.17                                    | S9                  |
| G-NDHCS-S            | 3.9                                                | 0.5                 | 200    | 839 - 520           | 0.19                                    | S10                 |
| N,S-codoped graphene | 4.6                                                | 0.5                 | 200    | 925 - 670           | 0.16                                    | S11                 |
| S@Co-NCNT/NP         | 3.2                                                | 0.5                 | 200    | 908 - 657           | 0.15                                    | S12                 |
| 3/S 72%              | 5.8                                                | 1                   | 200    | 572- 414            | 0.14                                    | <b>This<br/>wok</b> |

## References

- S1. S. L. Yang, H. B. Yao, M. R. Gao, S. H. Yu, *Cryst. Eng. Comm.*, 2009, **11**, 1383-1390.
- S2. D. Y. Go, J. Park, P. J. Noh, G. B. Cho, H. S. Ryu, T. H. Nam, H. J. Ahn, K. W. Kim, *Mater. Res. Bull.*, 2014, **58**, 190-194.
- S3. Z. Cui, C. Zu, W. Zhou, A. Manthiram, J. B. Goodenough, *Adv. Mater.*, 2016 **28**, 6926-6931.
- S4. X. C. Liu, Y. Yang, J. J. Wu, M. Liu, S. P. Zhou, B. D. A. Levin, X. D. Zhou, H. J. Cong, D. A. Muller, P. M. Ajayan, H. D. Abruña, F. S. Ke, *ACS Energy Lett.*, 2018, **3**, 1325-1330.
- S5. X. Q. Zeng, X. H. Gao, G. R Li, M. H. Sun, Z. Lin, M. Ling, J. C. Zheng C. D. Liang, *J. Mater. Chem. A*, 2018, **6**, 17142-17147.
- S6. M. X. Wang, L. S. Fan, X. Wu, D. Tian, J. H. Cheng, Y. Qiu, H. X. Wu, B. Guan, N. Q. Zhang, K. N. Sun, Y. Wang, *J. Mater. Chem. A*, 2018, **5**, 19613–19618.
- S7. M. M. Fang, Z. M. Chen, Y. Liu, J. P. Quan, C. Yang, L. C. Zhu, Q. B. Xu, Q. Xu, *J. Mater. Chem. A*, 2018, **6**, 1630-1638.
- S8. X. Y. Zhu, W. Zhao, Y. Z. Song, Q. C. Li, F. Ding, J. Y. Sun, L. Zhang, Z. F. Liu, *Adv. Energy Mater.*, 2018, **8**, 1800201-1800210.

- S9. J. B. Li, C. Y. Chen, Y. W. Chen, Z. H. Li, W. F. Xie, X. Zhang, M. F. Shao, M. Wei, *Adv. Energy Mater.*, 2019, 1901935-1901945.
- S10. G. M. Zhou, Y. B. Zhao, A. Manthiram, *Adv. Energy Mater.*, 2015, **5**, 1402263-1402273.
- S11. G. M. Zhou, E. Paek, G. S. Hwang, A. Manthiram, *Nat. Commun.*, 2015, **6**, 7760-7771.
- S12. T. Chen, B. R. Cheng, G. Y. Zhu, R. P. Chen, Y. Hu, L. B. Ma, H. L. Lv, Y. R. Wang, J. Liang, Z. X. Tie, Z. Jin, J. Liu, *Nano Lett.*, 2017, **17**, 437-444.
